# Supplementary material for: Discovery and characterization of the tubercidin biosynthetic pathway from Streptomyces tubercidicus NBRC 13090
Source: PubMed Central journal article supplement (PMC6112128; doi:10.1186/s12934-018-0978-8), 2018-08-28
Supplement: 12934_2018_978_MOESM1_ESM.pdf [file 12934_2018_978_MOESM1_ESM.pdf]

# Discovery and characterization of the tubercidin biosynthetic pathway from *Streptomyces tubercidicus* NBRC 13090

Yan Liu<sup>1</sup>, Rong Gong<sup>2</sup>, Xiaoqin Liu<sup>2</sup>, Peichao Zhang<sup>2</sup>, Qi Zhang<sup>1</sup>, You-Sheng Cai<sup>2</sup>, Zixin Deng<sup>2</sup>, Margit Winkler<sup>3</sup>, Jianguo Wu<sup>1\*</sup>, Wenqing Chen<sup>2\*</sup>

<sup>1</sup>State Key Laboratory of Virology, and College of Life Sciences, Wuhan University, Wuhan 430072, China.

<sup>2</sup>Key Laboratory of Combinatorial Biosynthesis and Drug Discovery, Ministry of Education, and School of Pharmaceutical Sciences, Wuhan University, Wuhan 430071, China.

<sup>3</sup>Austrian Centre of Industrial Biotechnology, Petersgasse 14, 8010 Graz, Austria.

\*For Correspondence: **Wenqing Chen**, School of Pharmaceutical Sciences, Wuhan University, Wuhan 430071, China. E-mail: [wqchen@whu.edu.cn](mailto:wqchen@whu.edu.cn), or **Jianguo Wu**, State Key Laboratory of Virology, and College of Life Sciences, Wuhan University, Wuhan 430072, China. E-mail: [jwu@whu.edu.cn](mailto:jwu@whu.edu.cn)

Running Title: the tubercidin biosynthetic pathway

## 1. Additional Figures

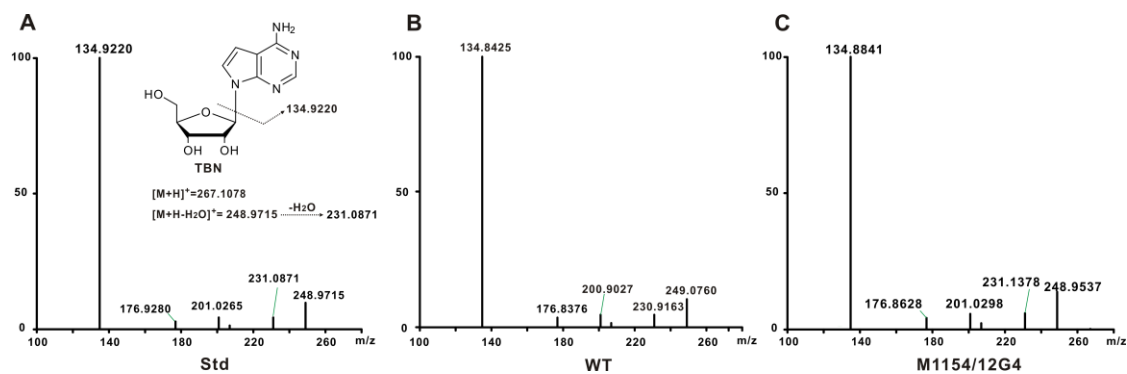

**Figure S1. LC-MS analysis of the target metabolite produced by *S. coelicolor* M1154/12G4.**

(A) MS/MS analysis of the TBN authentic standard. The fragmentation pattern of TBN is also shown in this panel. (B) MS/MS analysis of the target metabolite produced by the recombinant *S. coelicolor* M1154/12G4. (C) MS/MS analysis of TBN produced by *S. tubercidicus* NBRC 13090.

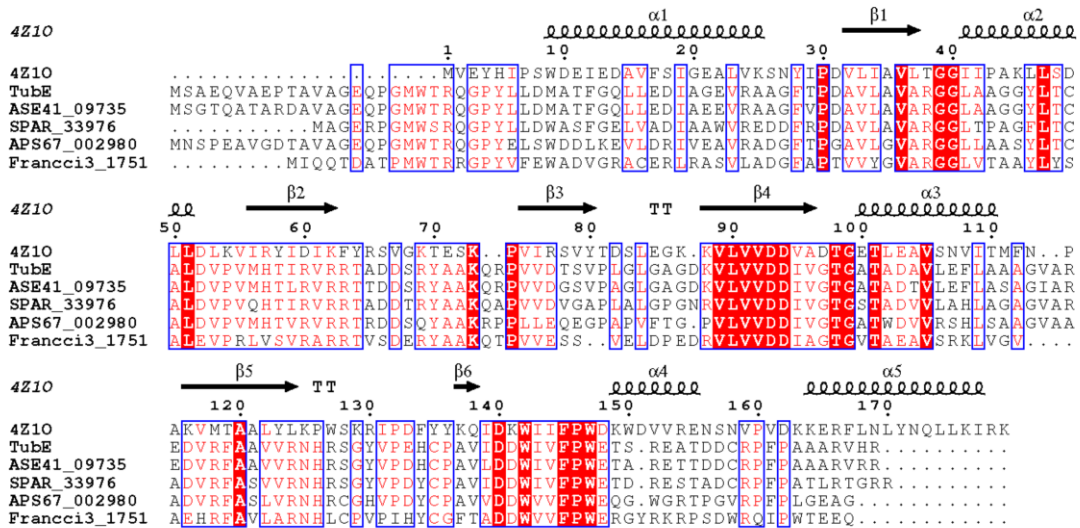

**Figure S2. Bioinformatic analysis of the phosphoribosyltransferase TubE with its homologs.**

Proteins include TubE (*S. tubercidicus* NBRC 13090), 4Z10 (*Sulfolobus solfataricus*, PDB: 4Z10\_A), ASE41\_09735 (*Streptomyces* sp. Root264, Accession no: KRD23283.1), SPAR\_33976 (*S. sparsogenes* DSM 40356, Accession no: OMI34940.1), APS67\_002980 (*Streptomyces* sp. AVP053U2, Accession no: ODA72681.1), Franci3\_1751 (*Frankia casuarinae*, Accession no: ABD11127.1). The sequences were aligned by ClustalW and merged with ESPript online program.

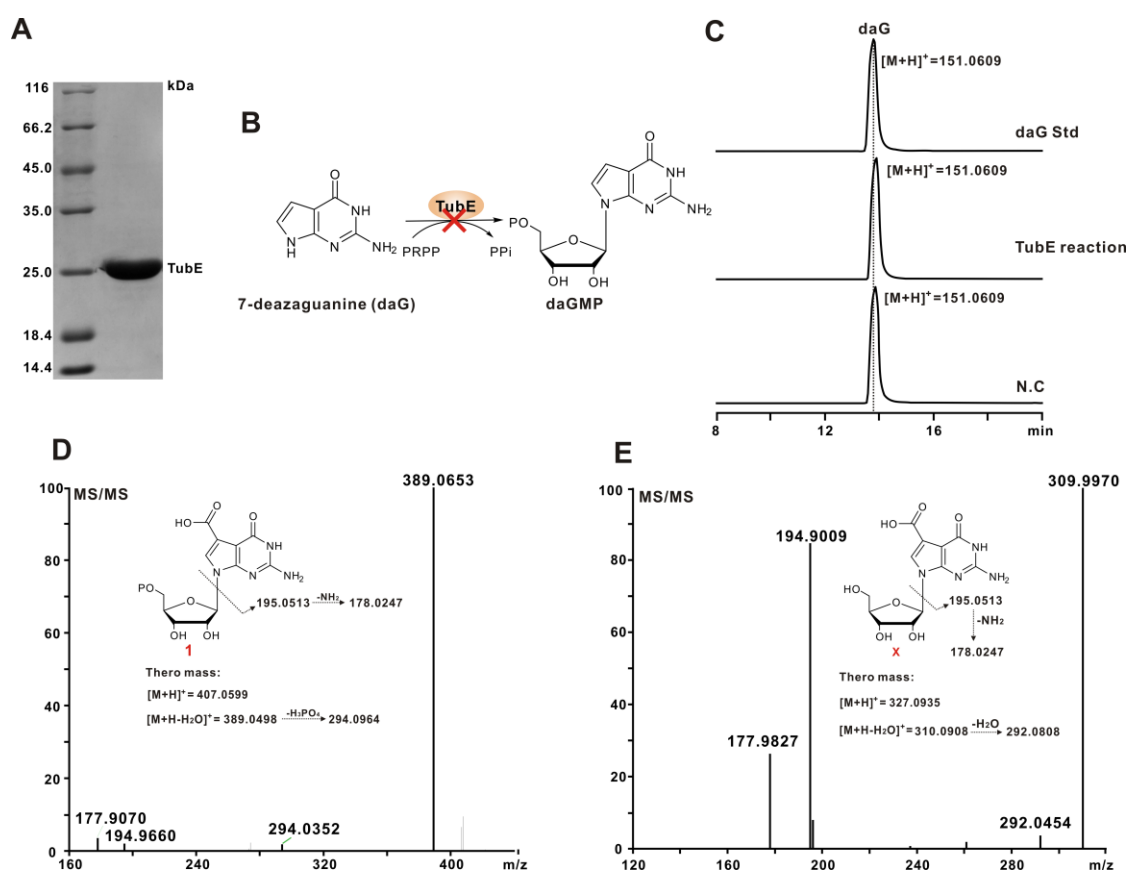

**Figure S3. Biochemical characterization of the TubE reaction.**

(A) SDS-PAGE analysis of the purified TubE from *E. coli*. (B) Schematic of the TubE-catalyzed reaction with daG as potential substrate. (C) Extracted ion chromatogram (EIC) analysis of the substrate daG and the deduced product daGMP. As indicated in Figure S3C, the target  $[M+H]^+$  ion of daG could only be detected from the TubE reaction, suggesting that this compound is not the substrate of TubE. (D) MS/MS analysis of the compound **1**. The fragmentation pattern is also shown in this panel. (E) MS/MS analysis of the target metabolite of the compound **X**. As indicated, the main fragment ions of **X** are well-matched to the theoretical pattern of dephosphorylated form of **1**, suggesting that **X** is spontaneously produced in the process of HPLC analysis.

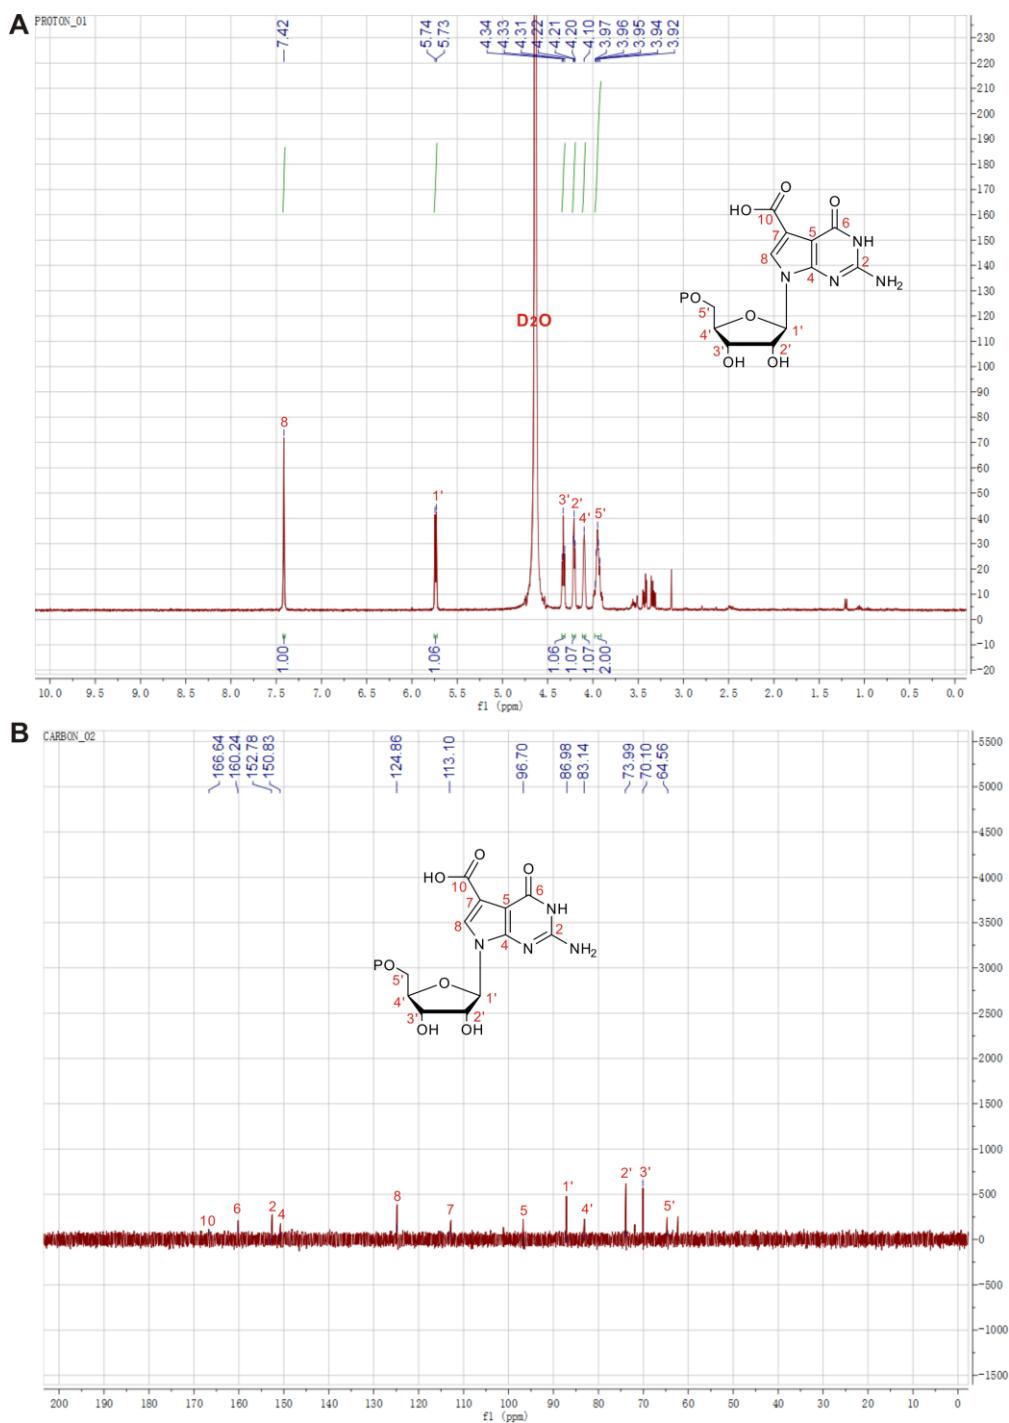

**Figure S4.  $^1\text{H}$  and  $^{13}\text{C}$  NMR analysis of the compound 1.**

(A)  $^1\text{H}$ -NMR spectrum of compound 1 (600 MHz,  $\text{D}_2\text{O}$ ). The  $^1\text{H}$  NMR data of compound 1 is listed as follows:  $^1\text{H}$  NMR (600 MHz,  $\text{D}_2\text{O}$ )  $\delta$  7.42 (1H, s), 5.74 (1H, d,  $J$  = 6.0 Hz), 4.33 (1H, t,  $J$  = 18.0 Hz), 4.22 (1H, t,  $J$  = 12.0 Hz), 4.10 (1H, m), 3.97-3.92 (2H, m).

(B)  $^{13}\text{C}$  NMR spectrum of compound 1.  $^{13}\text{C}$  NMR data of compound 1 is indicated as follows:  $^{13}\text{C}$  NMR (600 MHz,  $\text{D}_2\text{O}$ )  $\delta$  166.64, 160.24, 152.78, 150.83, 124.86, 113.10, 96.70, 86.98, 83.14, 73.99, 70.10, 64.56.

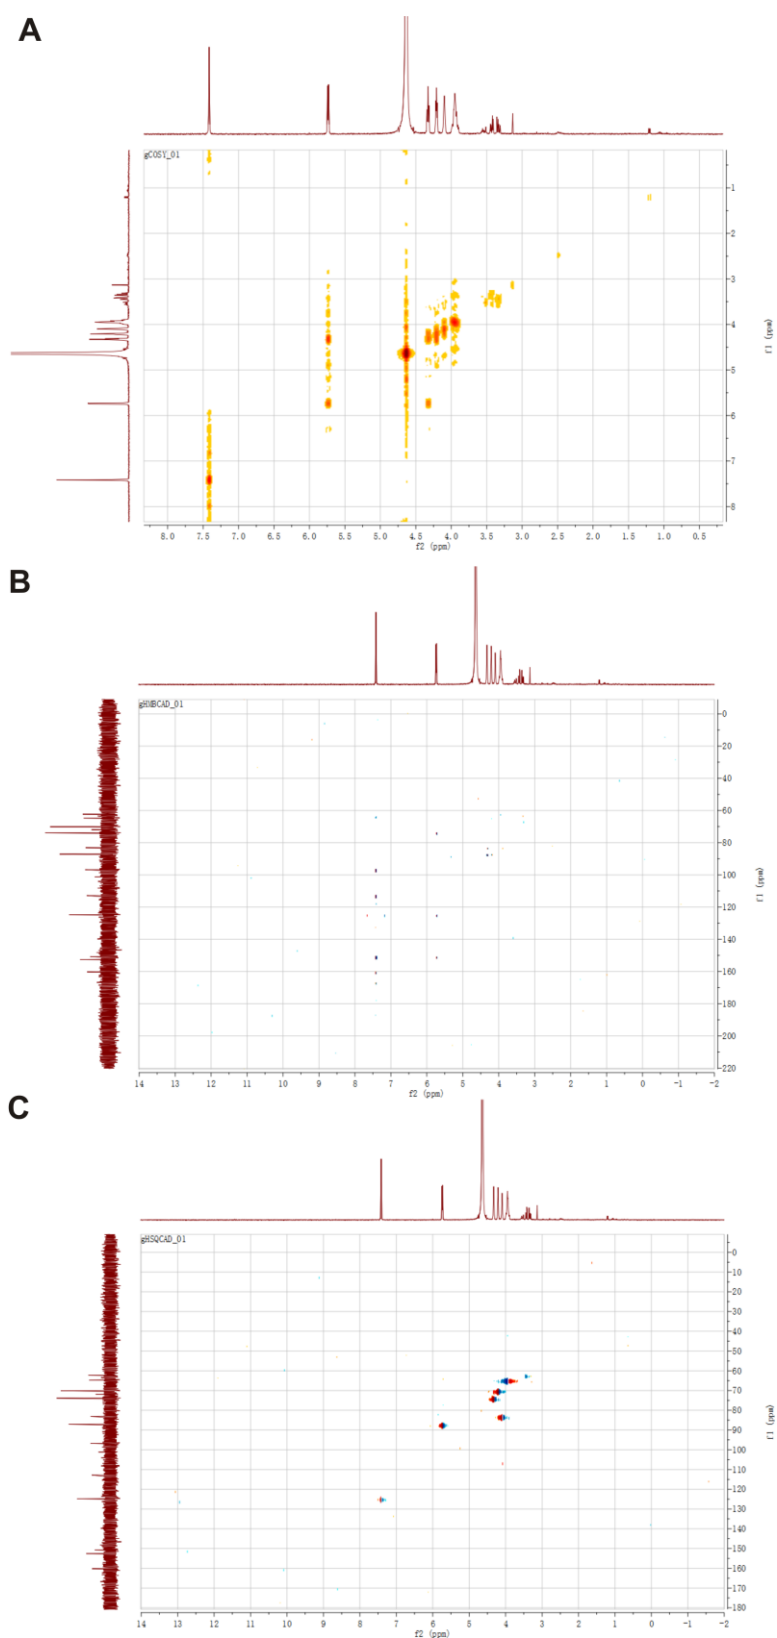

**Figure S5. <sup>1</sup>H-<sup>1</sup>H cosy, HMBC, and HSQC spectra of the compound **1**.**

(A) <sup>1</sup>H-<sup>1</sup>H cosy spectrum of compound **1** (600 MHz, D<sub>2</sub>O). (B) HMBC spectrum of compound **1** (600 MHz, D<sub>2</sub>O). (C) HSQC spectrum of compound **1** (600 MHz, D<sub>2</sub>O).

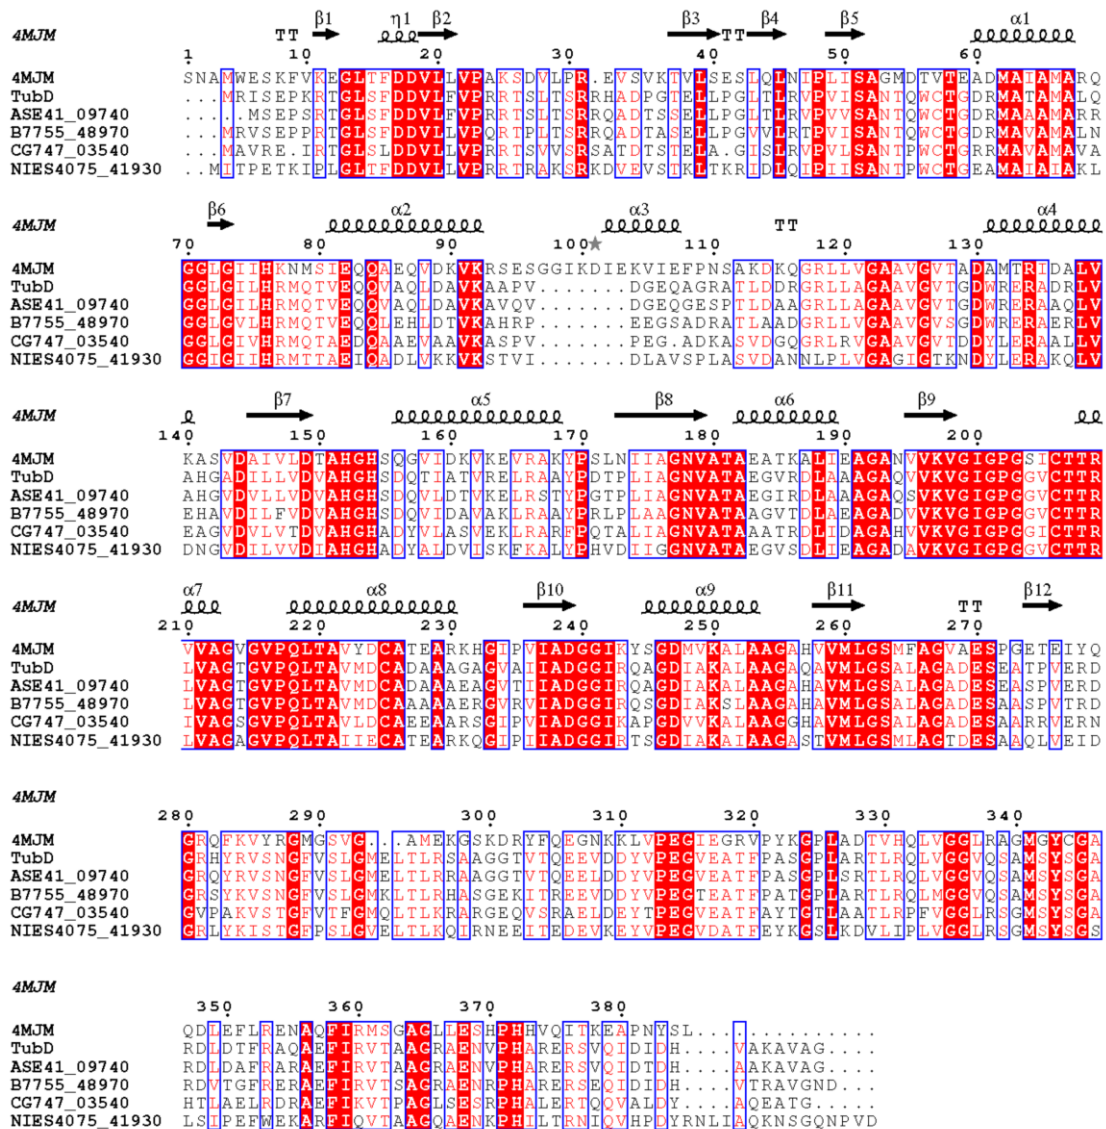

**Figure S6. Bioinformatic analysis of the GMP reductase TubD with its homologs.**

The detailed information for TubD and its homologs is as follows: 4MJM is from *Bacillus anthracis* Str. Ames (PDB: 4MJM\_A), ASE41\_09740 is from *Streptomyces* sp. Root264 (Accession no: KRD23537.1), B7755\_48970 is from *Streptomyces* sp. NBS 14/10 (Accession no: OXL22932.1), CG747\_03540 is from *Streptomyces* sp. CB02959 (GenBank: PJN41753.1), and NIES4075\_41930 is from *Tolypothrix* sp. NIES-4075. The sequences were aligned by ClustalW and merged with ESPrnt online program.

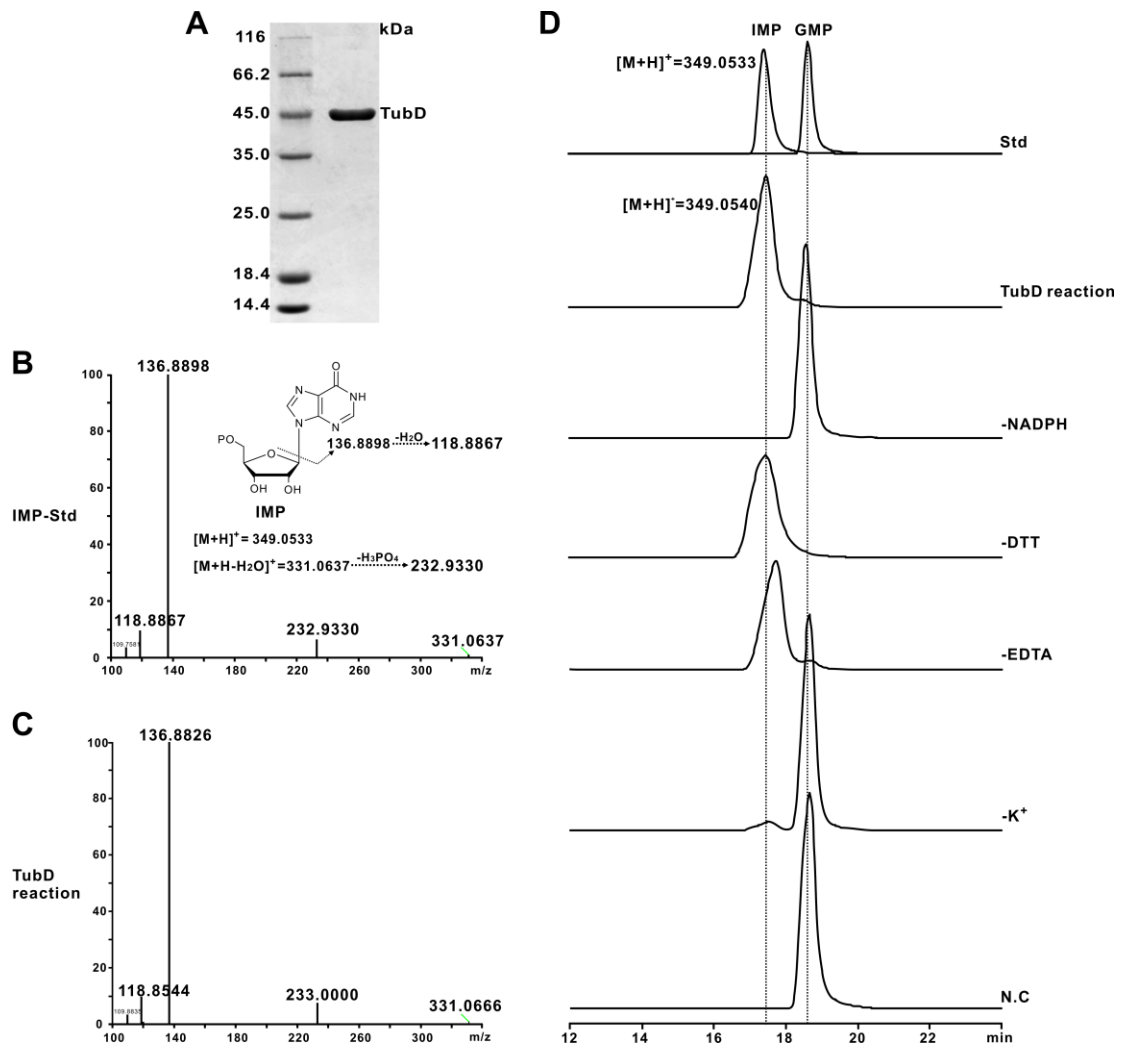

**Figure S7. Biochemical characterization of TubD-catalyzed reaction.**

(A) SDS-PAGE analysis of the purified TubD from *E. coli*. (B) MS/MS analysis of the IMP (inosine monophosphate) authentic standard. The fragmentation pattern is also indicated in this panel. (C) MS/MS analysis of the target metabolite of TubD-catalyzed reaction. (D) Biochemical determination of the factors that potentially affects the enzymatic activities of TubD. TubD reaction, the complete TubD reaction; -NADPH, the TubD reaction without NADPH added; -DTT, the TubD reaction without DTT added; -K<sup>+</sup>, the TubD reaction without K<sup>+</sup> added; N.C, the reaction without TubD added as negative control.



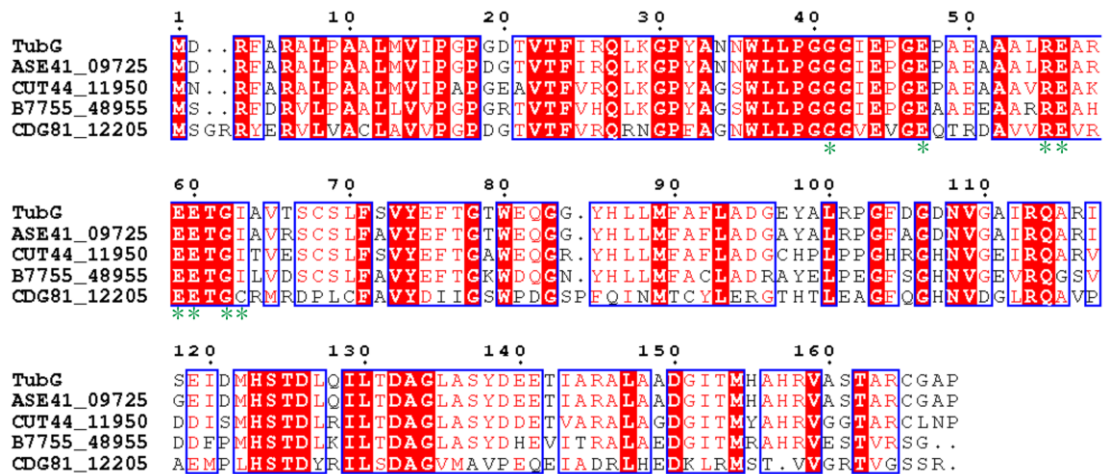

**Figure S8. Bioinformatics analysis of the Nudix superfamily hydrolase TubG.**

Bioinformatics analysis of TubG with its homologs. Proteins include TubG (*S. tubercidicus* NBRC 13090), ASE41\_09725 (*Streptomyces* sp. Root264, Accession no: KRD23281), CUT44\_11950 (*Streptomyces* sp. TRM SA0054, Accession no: PJE97395), B7755\_48955 (*Streptomyces* sp. NBS 14/10, OXL22929), and CDG81\_12205 (*Actinopolyspora erythraea*, ASU78919). These sequences are aligned by ClustalW and merged with ESPrnt online program. The conserved NUDIX motif “GX5EX7REUXEEXGV” was highlighted with green asterisks (\*) at the bottom of the conserved residues.

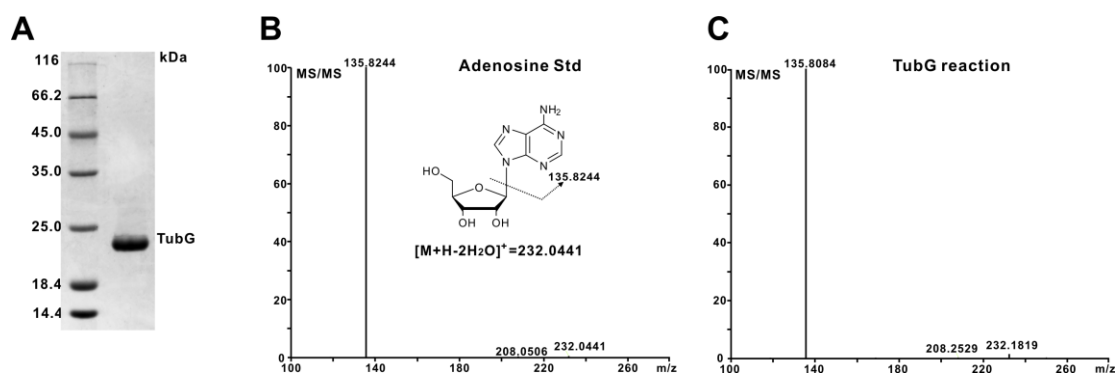

**Figure S9. Biochemical analysis of TubG and its reaction.**

(A) SDS-PAGE analysis of the purified TubG overexpressed in *E. coli*. (B) MS/MS analysis and fragmentation pattern of the adenosine authentic standard. (C) MS/MS analysis of the target product from TubG reaction using AMP as substrate.

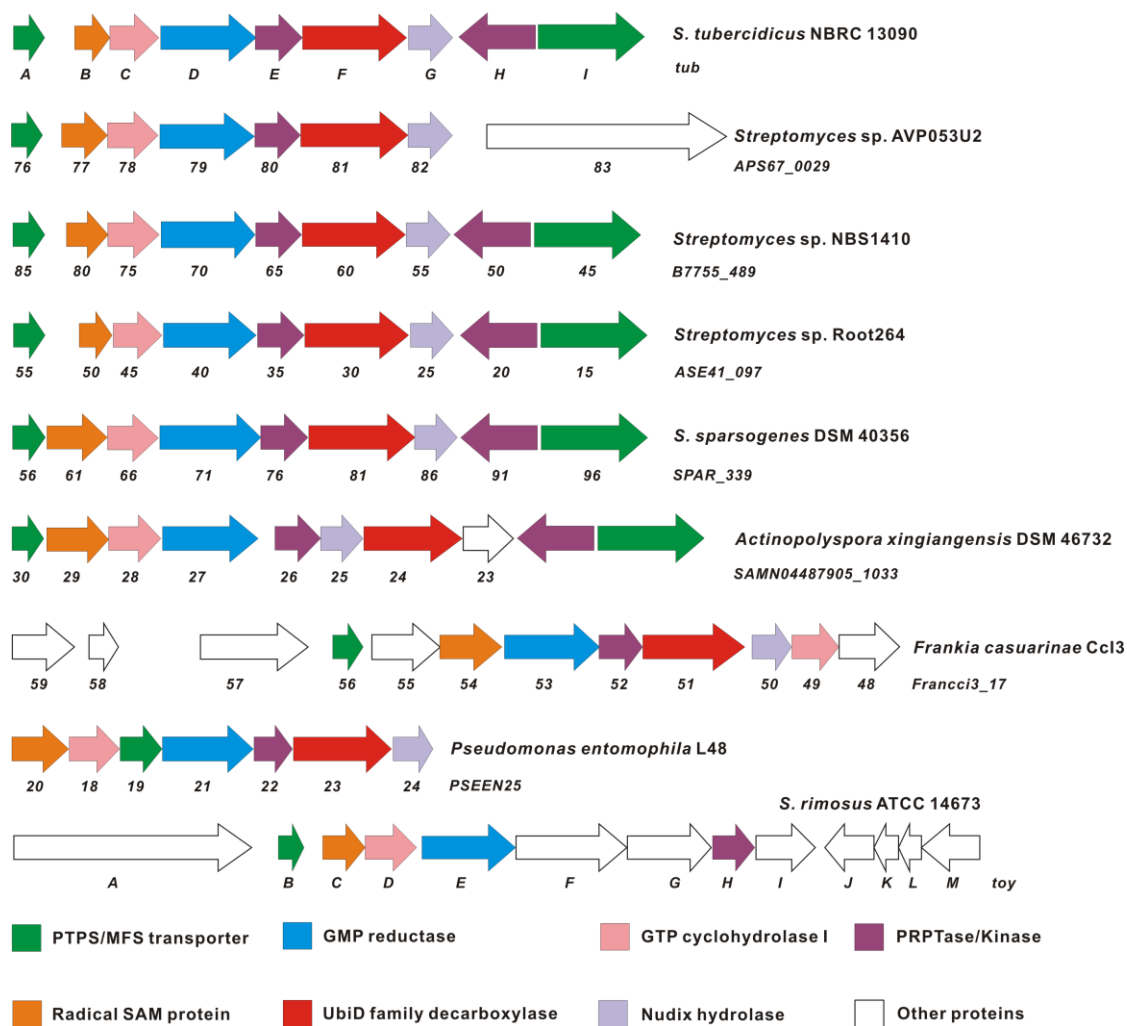

**Figure S10. Target-directed genome mining of the gene clusters for the potential TBN-related antibiotics.**

The potential gene clusters of the TBN-related antibiotics were obtained using the TubA, TubB, and TubC as probes. As indicated here, the proposed functions for the conserved proteins are highlighted with corresponding colors.

## 2. Additional Tables

**Table S1. Parameters for the genome sequencing and assembly of *S. tubercidicus*.**

| <b>Sample</b>                      | <b><i>S. tubercidicus</i> NBRC 13090</b> |
|------------------------------------|------------------------------------------|
| No. of all scaffolds               | 38                                       |
| Bases in all scaffolds             | 7888449                                  |
| No. of large scaffolds( > 1000 bp) | 22                                       |
| Bases in large scaffolds           | 7880373                                  |
| Largest length                     | 1607930                                  |
| Scaffold N50                       | 1309713                                  |
| Scaffold N90                       | 358127                                   |
| G+C content                        | 70.78                                    |
| N rate                             | 0.00679                                  |
| No. of all contigs                 | 53                                       |
| Bases in all contigs               | 7887913                                  |
| No. of large contigs(> 1000 bp)    | 36                                       |
| Bases in large contigs             | 7878900                                  |
| Largest length                     | 1302292                                  |
| Contig N50                         | 783438                                   |
| Contig N90                         | 298401                                   |
| Gene num                           | 7263                                     |

**Table S2. Strains, plasmids and cosmids used in this study.**

| Strain/<br>Plasmid /<br>Cosmid | Relevant characteristics                                                                                                                                                                                                                                                     | Reference<br>or source |
|--------------------------------|------------------------------------------------------------------------------------------------------------------------------------------------------------------------------------------------------------------------------------------------------------------------------|------------------------|
| <b>Strain</b>                  |                                                                                                                                                                                                                                                                              |                        |
| <i>S. tubercidicus</i>         |                                                                                                                                                                                                                                                                              |                        |
| NBRC 13090                     | Wild-type producer for tubercidin                                                                                                                                                                                                                                            | [1]                    |
| <i>S. coelicolor</i> M1154     | <i>S. coelicolor</i> A3(2) derivative used as heterologous host                                                                                                                                                                                                              | [2]                    |
| M1154/12G4                     | <i>S. coelicolor</i> M1154 derivative containing cosmid 12G4                                                                                                                                                                                                                 | This study             |
| M1154/pJTU2463b                | <i>S. coelicolor</i> M1154 derivative containing pJTU2463b                                                                                                                                                                                                                   | This study             |
| <b><i>E. coli</i></b>          |                                                                                                                                                                                                                                                                              |                        |
| DH10B                          | F <sup>-</sup> , <i>mcrA</i> , Δ( <i>mrr-hsdRMS-mcrBC</i> ), φ80d, <i>lacZ</i> ΔM15, Δ <i>lacX74</i> , <i>deoR</i> , <i>recA</i> , <i>lenda</i> , <i>lara</i> Δ139, D( <i>ara</i> , <i>leu</i> )7697, <i>galU</i> , <i>galk</i> , λ <sup>-</sup> , <i>rpsL</i> , <i>nupG</i> | Gibco-BRL              |
| Rosetta(DE3)/pLysS             | F <sup>-</sup> , <i>ompT</i> , <i>hsdS<sub>B</sub></i> ( <i>r<sub>B</sub><sup>-</sup>m<sub>B</sub><sup>-</sup></i> ), <i>gal</i> , <i>dcm</i> λ(DE3 [ <i>lacI lacUV5-T7 gene1 ind1 sam7 nin5</i> ]) pLysS (Cml <sup>R</sup> )                                                | Novagen                |
| ET12567(pUZ8002)               | F <sup>-</sup> , <i>dam</i> <sup>-</sup> , 13::Tn9, <i>dcm</i> <sup>-</sup> 6, <i>hsdM</i> , <i>hsdR</i> , <i>recF143</i> , <i>zjj-202::Tn10</i> , <i>galk2</i> , <i>galT22</i> , <i>ara14</i> , <i>pacY1</i> , <i>xyl-5</i> , <i>leuB6</i> , <i>thi-1</i> , pUZ8002         | [3]                    |
| EPI300-T1 <sup>R</sup>         | host cell for genomic library construction                                                                                                                                                                                                                                   | Epicenter              |
| <b>Plasmids</b>                |                                                                                                                                                                                                                                                                              |                        |
| pEASY-Blunt                    | pUCori, <i>lacZ</i> , <i>f1 ori</i> , <i>neo</i> , <i>bla</i>                                                                                                                                                                                                                | TransGen<br>Biotech    |
| pJTU2463b                      | <i>int</i> , <i>aac(3)IV</i> , <i>oriT</i> , RK2, <i>phiC31</i> , <i>attP</i>                                                                                                                                                                                                | [4]                    |
| pET28a                         | <i>neo</i> , <i>rep</i> <sup>pMB1</sup> , T7 promoter                                                                                                                                                                                                                        | Novagen                |
| pET28a/ <i>tubE</i>            | pET28a derivative with an engineered NdeI-EcoRI fragment containing <i>tubE</i> cloned into counterpart sites                                                                                                                                                                | This study             |
| pET28a/ <i>tubD</i>            | pET28a derivative with an engineered NdeI-EcoRI fragment containing <i>tubD</i> cloned into counterpart sites                                                                                                                                                                | This study             |
| pET28a/ <i>tubG</i>            | pET28a derivative with an engineered NdeI-EcoRI fragment containing <i>tubG</i> cloned into counterpart sites                                                                                                                                                                | This study             |
| 12G4                           | pJTU2463b derived cosmid containing the entire TBN biosynthetic gene cluster                                                                                                                                                                                                 | This study             |

**Table S3. PCR primers used in this study.**

| <b>Primers</b> | <b>Sequence ( 5'--3' )</b> |
|----------------|----------------------------|
| TubidF         | CGAGGGCGACGACTACGAGA       |
| TubidR         | CGGGTGGTGAAGCCATAAGT       |
| 2463seqF       | GCCATAGAGGGGCGTCGTG        |
| 2463seqR       | TAAGTGC GGCGACGATAGT       |
| TubDexF        | gtccat ATGCGAATCTCCGAACCGA |
| TubDexR        | ggaatTCATCCCGCCACCGCCTT    |
| TubEexF        | gtccat ATGAGCGCGAACAGGTCG  |
| TubEexR        | ggaatTCACCGGTGCACCCGCGCCG  |
| TubGexF        | gtccat ATGGACCGATTCGCGCGAG |
| TubGexR        | ggaatTCACGGCGCGCCGACCGG    |

#### **4. Additional References**

1. Smulson ME, Suhadolnik RJ: **The biosynthesis of the 7-deazaadenine ribonucleoside, tubercidin, by *Streptomyces tubercidicus*.** *J Biol Chem* 1967, **242**:2872-2876.
2. Gomez-Escribano JP, Bibb MJ: **Engineering *Streptomyces coelicolor* for heterologous expression of secondary metabolite gene clusters.** *Microb Biotechnol* 2011, **4**:207-215.
3. Kieser T, Bibb MJ, Chater KF, Butter MJ, Hopwood. DA: *Practical Streptomyces Genetics* 2000:2<sup>nd</sup> ed., John Innes Foundation, Norwich, United Kingdom.
4. Cheng L, Chen W, Zhai L, Xu D, Huang T, Lin S, Zhou X, Deng Z: **Identification of the gene cluster involved in muraymycin biosynthesis from *Streptomyces* sp. NRRL 30471.** *Mol Biosyst* 2011, **7**:920-927.
